# Supplementary material
Source: PubMed Central journal article supplement (PMC9164172)
Supplement: NIHMS1781229-supplement-3.pdf [file NIHMS1781229-supplement-3.pdf]

**Objective:** To evaluate safety/tolerability, anti-tumor activity, and RP2D of telaglenastat in combination with everolimus or cabozantinib in patients with mRCC

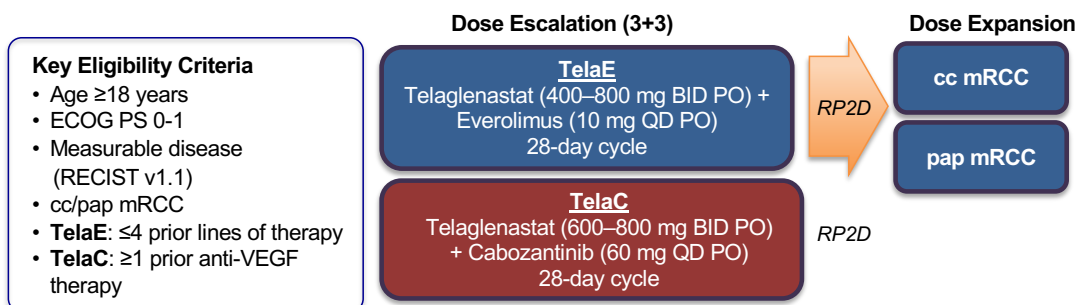

**Tumor response (RECIST 1.1) assessed every 8 weeks**

BID, twice daily; cc, clear cell; pap, papillary; PO, per oral; QD, once daily; RP2D, recommended phase 2 dose

**Figure S2. Study Schema**
